# Supplementary material for: Anti-Inflammatory Effects of 6,8-Diprenyl-7,4′-dihydroxyflavanone from Sophora tonkinensis on Lipopolysaccharide-Stimulated RAW 264.7 Cells
Source: PubMed Central journal article supplement (PMC6274169; doi:10.3390/molecules21081049), 2016-08-11
Supplement: molecules-21-01049-s001.pdf [file molecules-21-01049-s001.pdf]

# Supplementary Materials: Anti-Inflammatory Effects of 6,8-Diprenyl-7,4'-dihydroxyflavanone from *Sophora tonkinensis* in Lipopolysaccharide-Stimulated RAW 264.7 Cells

Hee-Sung Chae, Hunseung Yoo, Young-Mi Kim, Young Hee Choi, Chang Hoon Lee and Young-Won Chin

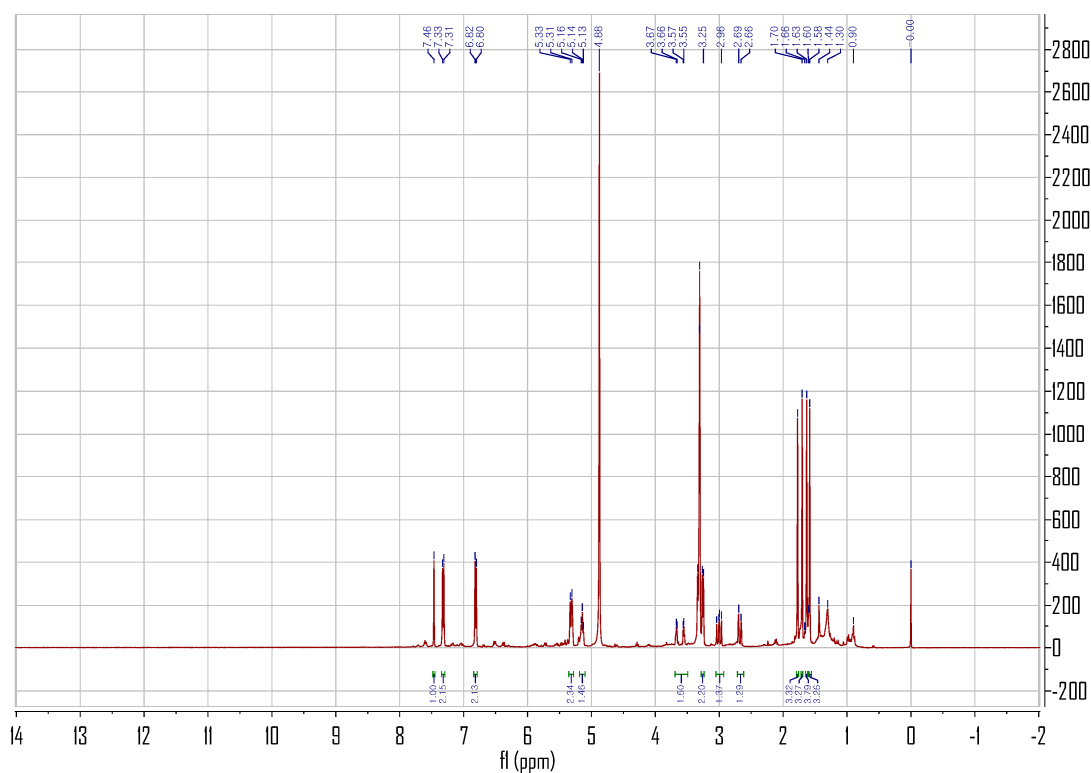

Figure S1. <sup>1</sup>H-NMR spectrum of 6,8-diprenyl-7,4'-dihydroxyflavanone.

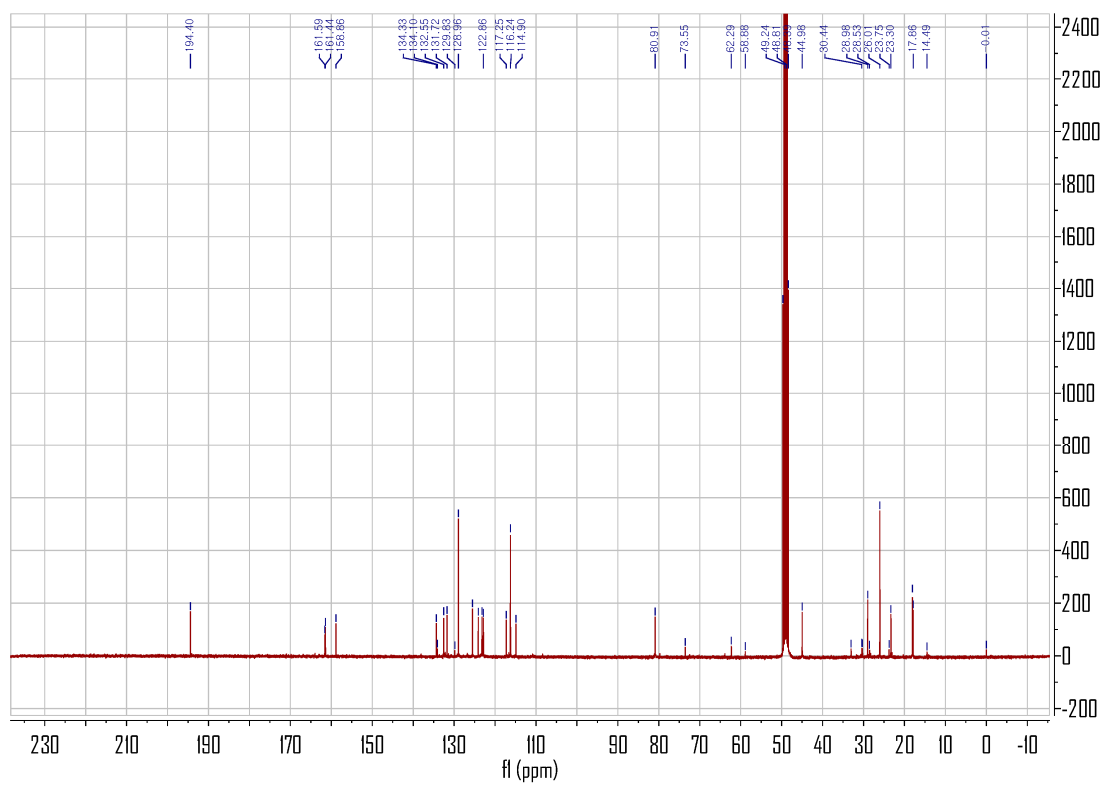

**Figure S2.**  $^{13}\text{C}$ -NMR spectrum of 6,8-diprenyl-7,4'-dihydroxyflavanone.
